# Supplementary material for: Functional network analysis of gene-phenotype connectivity associated with temozolomide
Source: PubMed Central journal article supplement (PMC5675653; doi:10.18632/oncotarget.20848), 2017-09-12
Supplement: oncotarget-08-87554-s001.pdf [file oncotarget-08-87554-s001.pdf]

## **Functional network analysis of gene-phenotype connectivity associated with temozolomide**

### **SUPPLEMENTARY MATERIALS**

**Supplementary Table 1: Output of search and analysis by STRING on MGMT associated protein-protein interaction (PPI) related to Temozolomide.**

See Supplementary File 1
